# Supplementary material for: Potassium Improves Drought Stress Tolerance in Plants by Affecting Root Morphology, Root Exudates, and Microbial Diversity
Source: MDPI journal article supplement (doi:10.3390/metabo11030131), 2021-02-24
Supplement: s1 [file s1]

Experimental photos with roots bags

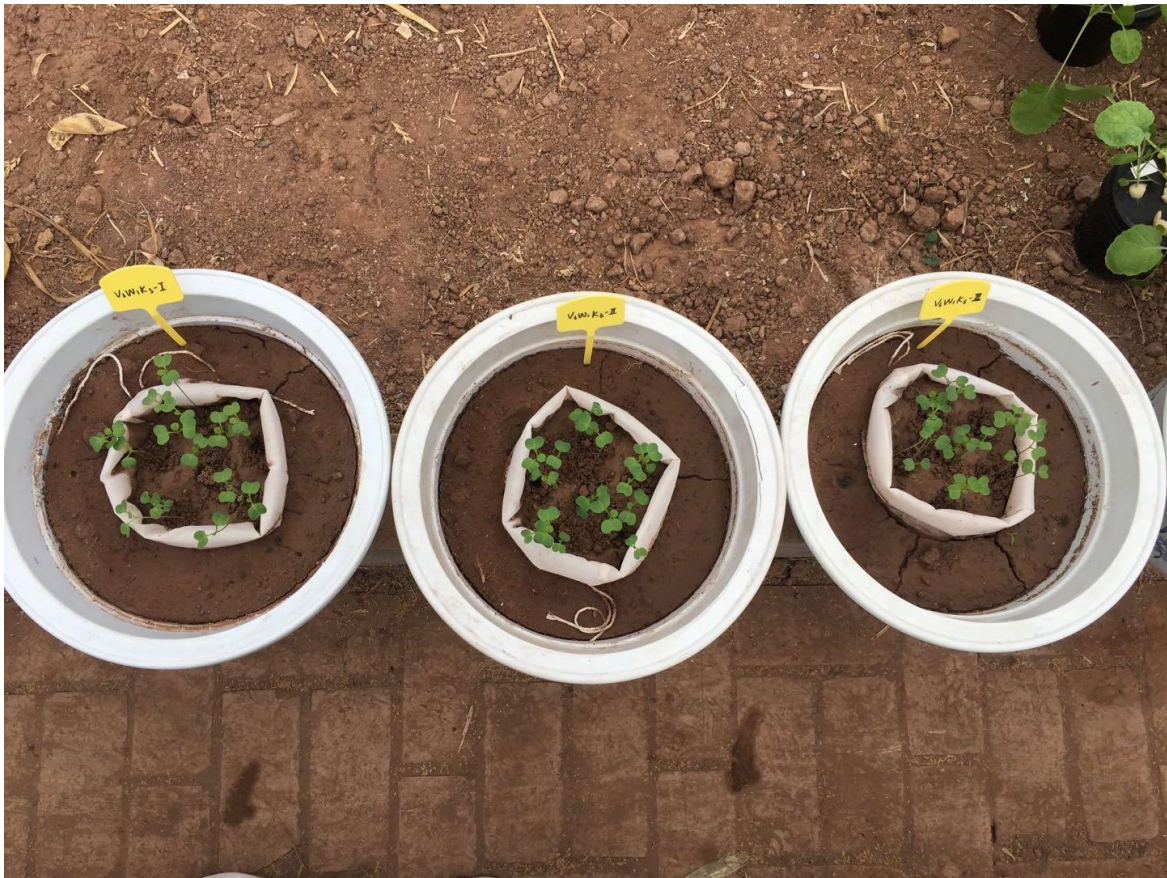

Figure S1: Root bags in seeds spotting and soil sampling period.

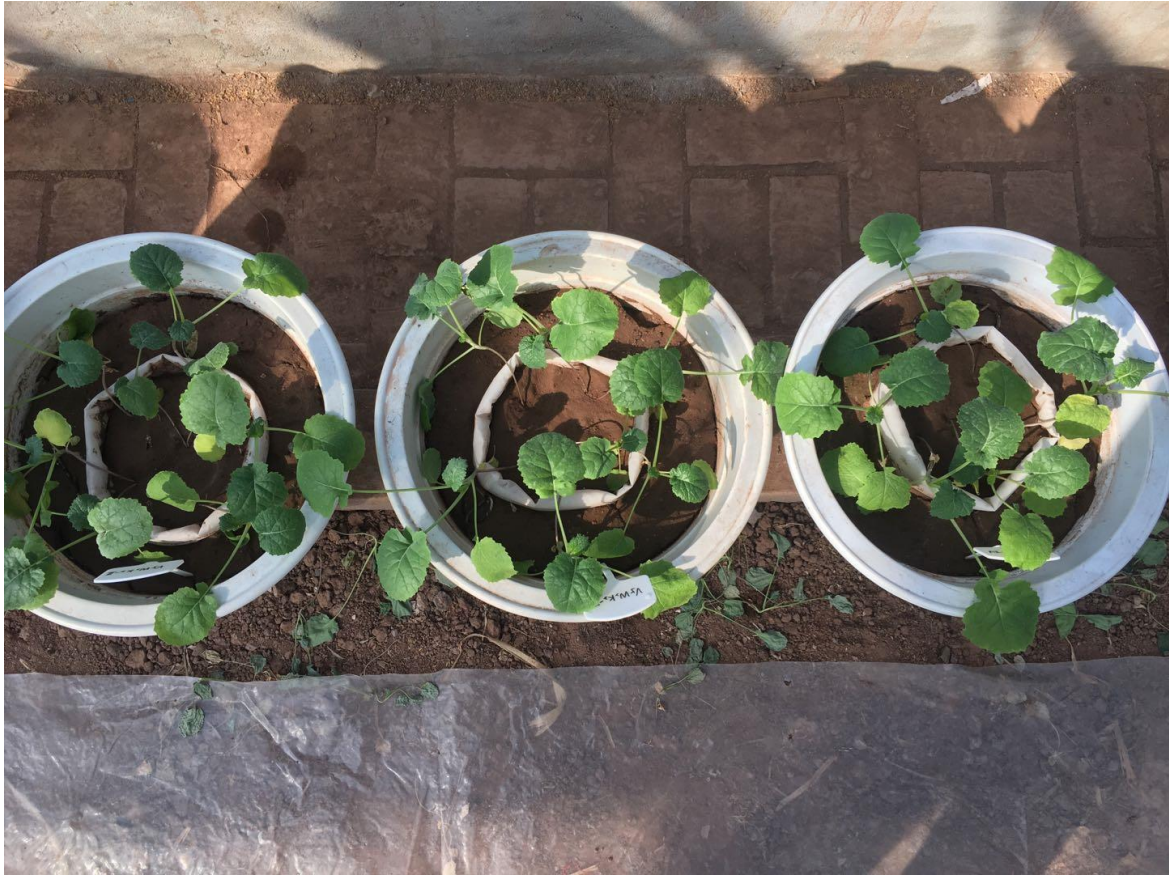

**Figure S2:** Root bags in seeds spotting and soil sampling period.
